# Supplementary material for: OH radical-initiated single-electron transfer for accelerated degradation via carbocation intermediates
Source: Royal Society of Chemistry journal article supplement (doi:10.1039/d2sc06915f), 2023-01-01
Supplement: d2sc06915f1.pdf [file d2sc06915f1.pdf]

## Supporting Information

### **The OH Radical-Initiated Single-Electron Transfer for Accelerated Degradation via Carbocation Intermediates**

Xiyang Ge, Yiyan Yin, Jianghui Sun, Jin Ouyang, Na Na\*

Key Laboratory of Radiopharmaceuticals, Ministry of Education, College of Chemistry, Beijing Normal University, Beijing 100875, China

\*Corresponding Authors

Email : nana@bnu.edu.cn

### **Contents**

|                               |     |
|-------------------------------|-----|
| Experimental Procedures ..... | S2  |
| Figure S1 .....               | S5  |
| Figure S2 .....               | S6  |
| Figure S3 .....               | S7  |
| Figure S4 .....               | S8  |
| Figure S5 .....               | S9  |
| Figure S6 .....               | S10 |
| Figure S7 .....               | S11 |
| Figure S8 .....               | S12 |
| Figure S9 .....               | S13 |
| Figure S10 .....              | S14 |
| Figure S11 .....              | S15 |
| Figure S12 .....              | S16 |
| Figure S13 .....              | S17 |
| Figure S14 .....              | S18 |
| Figure S15 .....              | S19 |
| Table S1 .....                | S20 |
| Table S2 .....                | S21 |
| Table S3 .....                | S22 |

**Experimental Procedures**

**Chemicals** All reagents and solvents were purchased from commercial sources and used without further purification. Manganese sulfate monohydrate ( $\text{MnSO}_4 \cdot \text{H}_2\text{O}$ ), sodium persulfate ( $\text{Na}_2\text{S}_2\text{O}_8$ ), 3,3',5,5'-Tetramethylbenzidine (TMB) and hydroxychloroquine sulfate (HCQ) were purchased from Innochem. (Beijing, China). Methanol and Isopropyl alcohol of HPLC grade were purchased from Fisher Chemical (USA). Deionized water (Mill-Q, Millipore, 18.2 M $\Omega$ ) was used in all experiments.

**Mass spectrometry** On-line monitoring was performed on an LTQ XL (Thermo Fisher Scientific, USA) instrument using a homemade ionization source of ESSI-MS. The operational parameters were as follows: full-scan positive (+) ion spectra were obtained over the m/z range from 50 to 500; the temperature of the MS inlet capillary was 250 °C; the capillary voltage and tube lens voltage were set to 100 V and 120 V, respectively. The maximum ion injection time was 1000 ms. In addition, 5kV high voltage was added to the solution. All MS results were obtained and processed using the Xcalibur or Microcal Origin (version 8.0) software. High-resolution mass spectrometry was conducted using a Triple TOF 5600+ (AB SCIEX, USA). The mass spectrometer was equipped with a heated electrospray ionization (HESI) source. Analyses were carried out in positive mode.

**Other instruments** Transmission electron microscopy (TEM) imaging was performed on an FEI Talos 200S transmission electron microscope with an operating voltage of 200 kV. Field emission scanning electron microscopy (FESEM) was carried on the S-8010 (Hitachi, Japan). UV-vis absorbed spectra was measured by a UV 2600 spectrophotometer (Shimadzu, Japan). FLS980 fluorescence spectrophotometer (Edinburgh Instruments, UK). X-ray diffraction measurements were performed with a Maxima XRD-7000 (Shimadzu, Japan). The XPS spectra were recorded using a PHI-5300 ESCA spectrometer (Perkin Elmer) equipped with an Al K $\alpha$  excitation source. Electron Paramagnetic Resonance (EPR) spectra were collected with a Bruker ER200-SRC-10/12 spectrometer. Raman spectra were recorded at room temperature using a Raman spectrometer (Renishaw RM-1000) in a back-scattering

geometry with a 532 nm laser as the excitation source. Fourier transform infrared (FT-IR) spectra of the samples were analyzed on a Perkin-Elmer TGA 7 infrared spectrometer to identify the functional groups on the surface of all samples.

**Synthesis of  $\beta$ -MnO<sub>2</sub>** 9.5 mmol of MnSO<sub>4</sub>·H<sub>2</sub>O and 9.5 mmol of Na<sub>2</sub>S<sub>2</sub>O<sub>8</sub> were mixed in 70 mL of distilled water for well stirring. The solution was then transferred into a stainless-steel autoclave and heated at 90 °C for 24 h. The solution was collected after each cycle by filtration, washed with water and ethanol, and then dried in a vacuum oven. The black solid was calcinated at 350 °C for 3 h in an air atmosphere to obtain  $\beta$ -MnO<sub>2</sub> nanorods <sup>[1]</sup>.

**Degradation Measurement** 10mg  $\beta$ -MnO<sub>2</sub> was directly added to the HCQ solution to 1 uM HCQ solution and dispersed evenly by ultrasound. Under the condition of stirring, the air plasma was passed into the MnO<sub>2</sub> mixed solution, and the solution formed electro spray into the mass spectrum by a capillary injection device. At the same time, the air plasma was passed into the HCQ solution without MnO<sub>2</sub> to compare the influence of catalyst. In the comparison experiment, the conditions of the plasma system without MnO<sub>2</sub> reaction were the same as above. To study the active species, without changing other experimental conditions, excess TMB and isopropanol were added immediately after adding the plasma into the HCQ solution with MnO<sub>2</sub>, respectively.

**Computational procedure** Quantum chemical calculations were performed using density functional theory (DFT) with the Gaussian 09 program package <sup>[2]</sup>. The geometrical parameters of reactants, intermediates (IM), transition states (TS), and products were optimized at the M06-2X/DEF2TZVP level. Vibrational frequencies were computed analytically at the same level of theory to correct for zero-point energy (ZPE) and confirm whether the structures are minima (no imaginary frequencies) or transition states (only one imaginary frequency). The transition state was also verified with the intrinsic reaction

coordinate (IRC) calculations. Moreover, the solvent effect was evaluated by using water as the solvent. The condensed electrostatic potential (ESP) mapped molecular surface was obtained by the Multiwfn program. The Fukui function was introduced to describe the nucleophilic, electrophilic, and radical attacks. The simplified Fukui function corresponding to the above three situations are as follows:

$$\text{Nucleophilic attack: } f^+(r) = \rho_{N+1}(r) - \rho_N(r) \quad (1)$$

$$\text{Electrophilic attack: } f^-(r) = \rho_N(r) - \rho_{N-1}(r) \quad (2)$$

$$\text{Radical attack: } f^0(r) = [f^+(r) + f^-(r)]/2 = [\rho_{N+1}(r) - \rho_{N-1}(r)]/2. \quad (3)$$

where  $\rho_{N+1}(r)$ ,  $\rho_N(r)$  and  $\rho_{N-1}(r)$  are the electronic densities of the system with N+1, N and N-1 electrons, respectively. And the nucleophilic, electrophilic and radical attacks were evaluated by Eqs. (1) - (3), respectively. In this article, all electronic structures were analyzed by Multiwfn software [3].

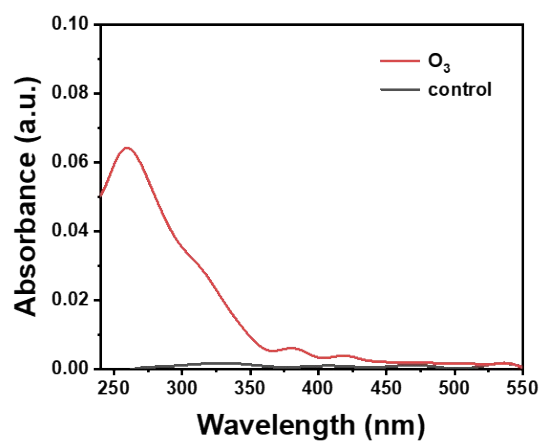

**Figure S1** The UV-vis absorption of plasma-treated water. The absorption at about 254 nm indicated the presence of O<sub>3</sub>.

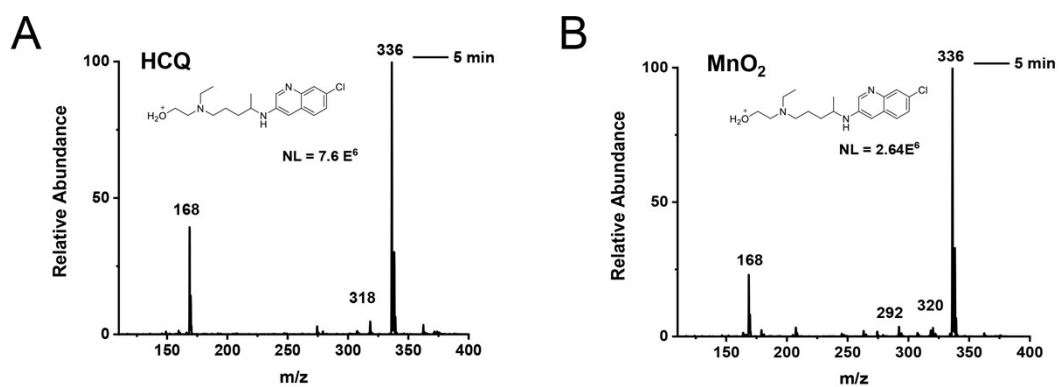

**Figure S2** Mass spectra of reaction intermediates in (A) HCQ system and (B) MnO<sub>2</sub> system at 5 min.

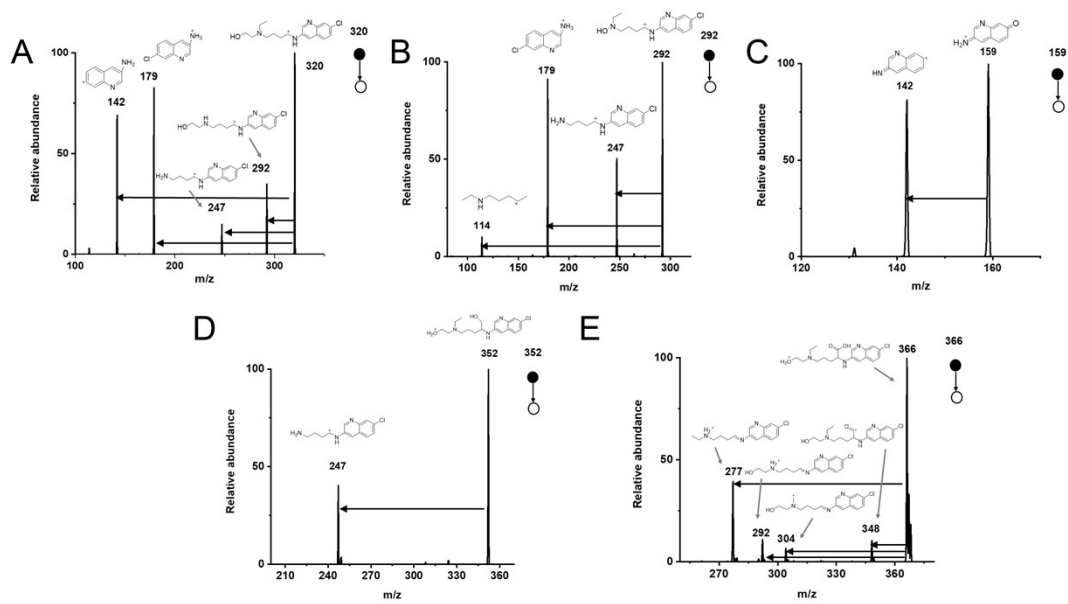

**Figure S3** The CID diagram of ions (A) m/z 320; (B) m/z 292; (C) m/z 159; (D) m/z 352 and (E) m/z 366 in the MnO<sub>2</sub>-plasma system.

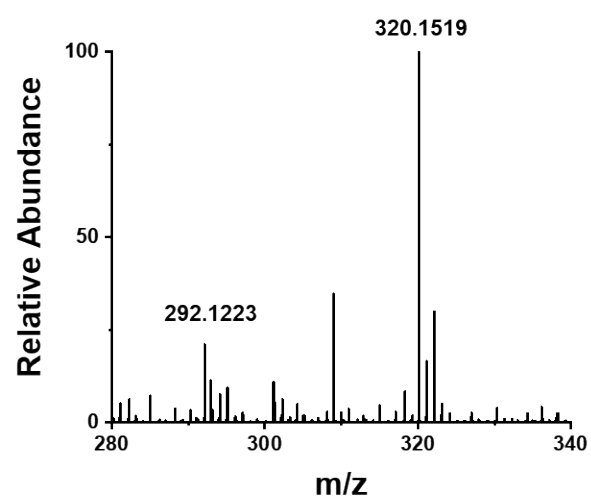

**Figure S4** The high-resolution mass spectrometry (HR-MS) of carbocations.



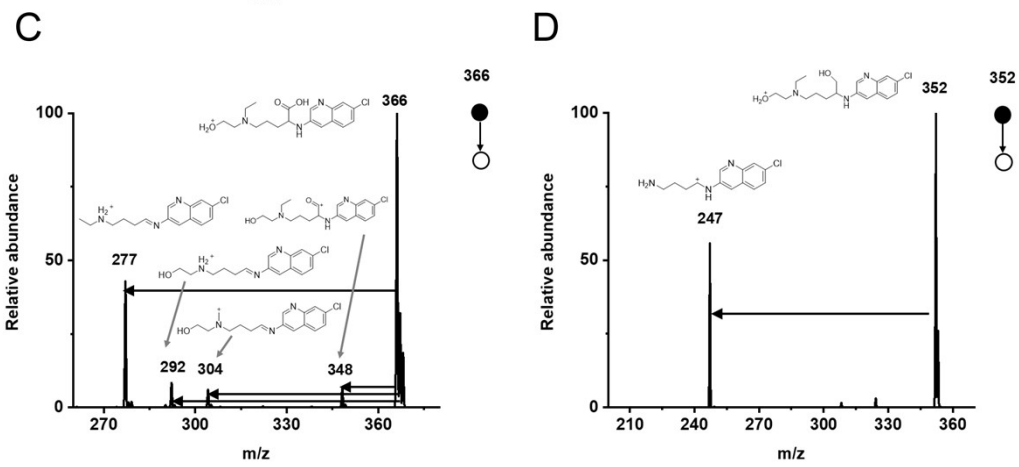

**Figure S5** The CID diagram of ions (A) m/z 366 and (B) m/z 352 in the single plasma system.

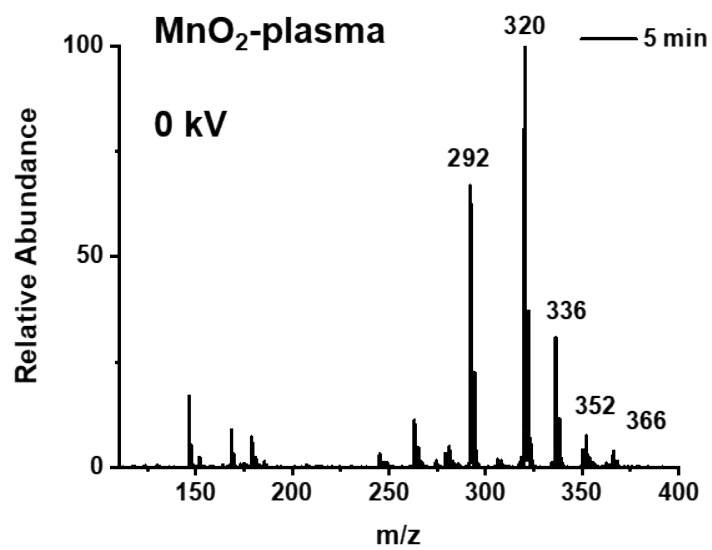

**Figure S6** Mass spectra of reaction intermediates in the MnO<sub>2</sub>-plasma system without high-voltage of ESSl applied on. Degradation: for 5 min.

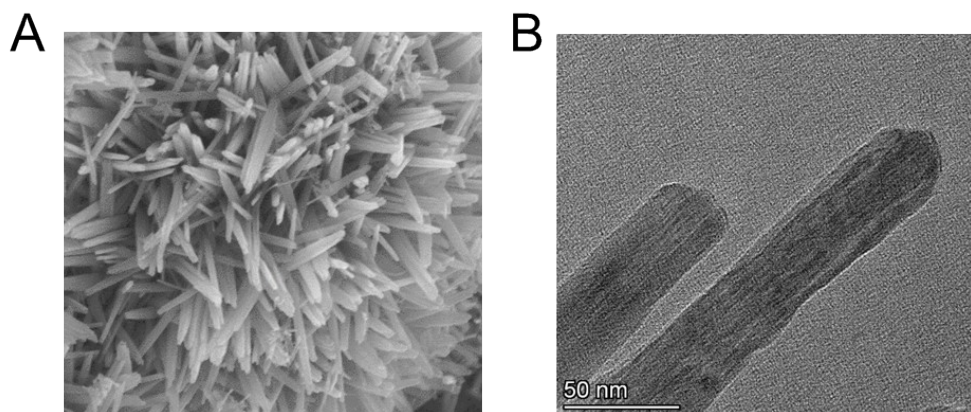

**Figure S7** Structure of prepared MnO<sub>2</sub> nanorod. (A) SEM image and (B) TEM image.

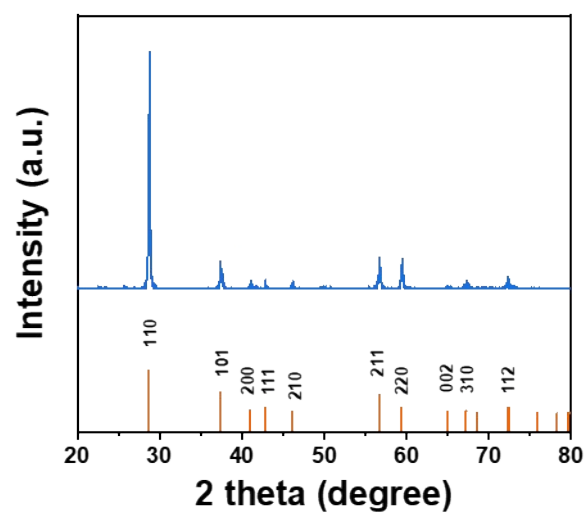

**Figure S8** XRD pattern of  $\beta$ - $\text{MnO}_2$ .

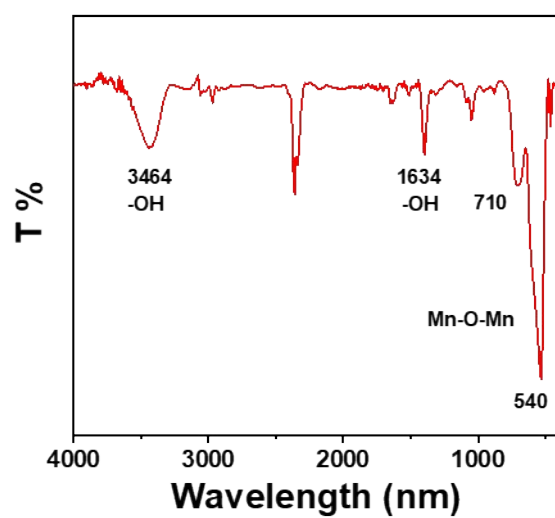

**Figure S9** FTIR spectrum of MnO<sub>2</sub>.

A

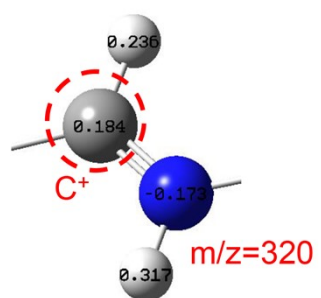

B

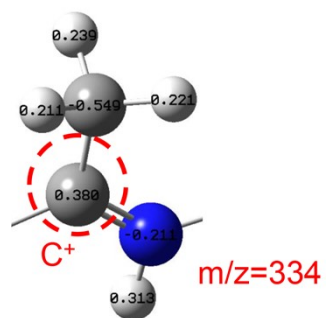

**Figure S10** The charge distribution of C<sup>+</sup> in carbocations of C1 (m/z 320, A) and C1' (m/z 334, B).

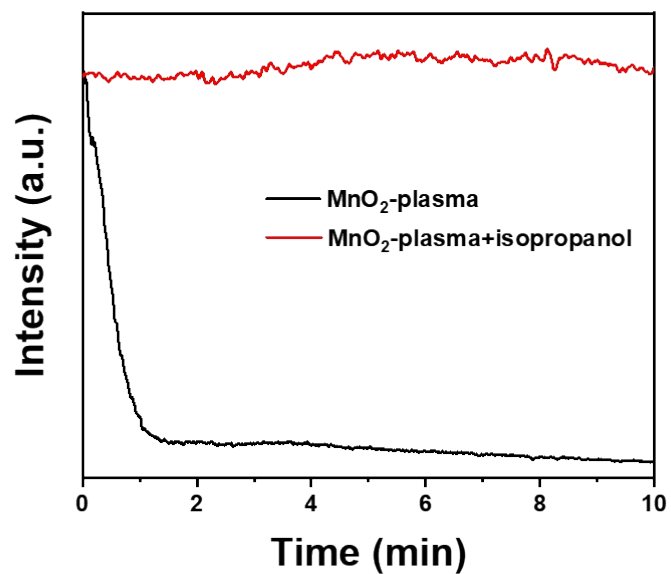

**Figure S11** The on-line monitoring of [HCQ + H]<sup>+</sup> in the MnO<sub>2</sub>-plasma with isopropanol and without isopropanol.

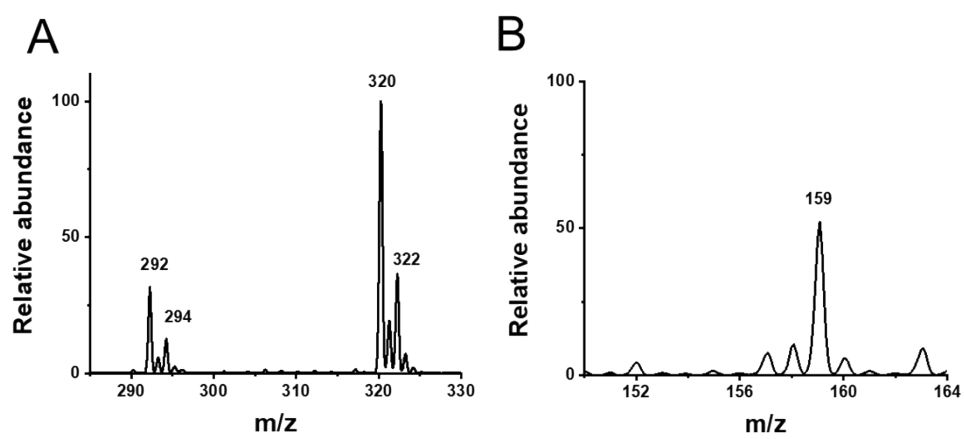

**Figure S12**  $[M+2]^+$  peaks of ions at m/z 320, 292 and 159.



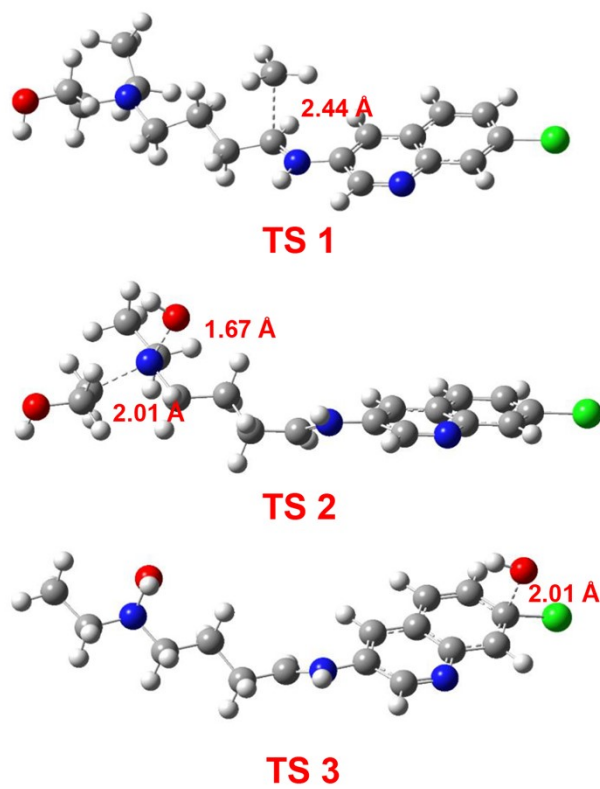

**Figure S13** The transition states (TS) of the formation of the carbocations.

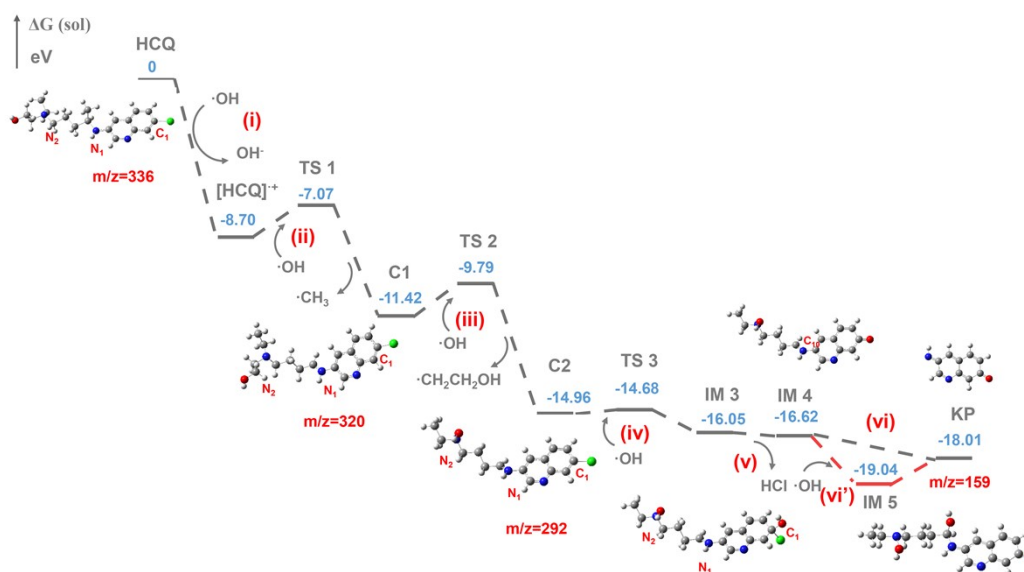

**Figure S14** The energy diagram for the HCQ degradation.

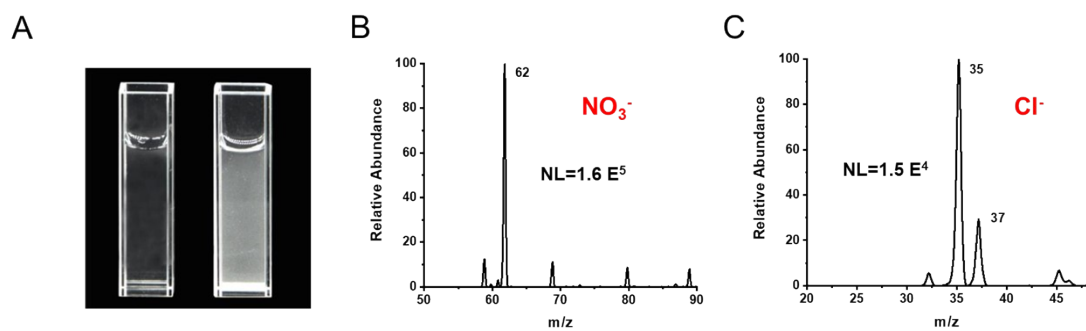

**Figure S15** The examination on the final products of the advanced degradation. (A) The pictures of  $\text{Ca}(\text{OH})_2$  solutions (0.17 g/mL) before (left) and after (right) introducing gas products. MS spectra of  $\text{NO}_3^-$  (B) and  $\text{Cl}^-$  (C) recorded in the reaction solution after 1h of degradation.

**Table S1** The carbocation intermediates with element composition and ppm error.

| m/z      | Calculated | Element Composition                                | Ppm error |
|----------|------------|----------------------------------------------------|-----------|
| 320.1519 | 320.1524   | C <sub>17</sub> H <sub>23</sub> N <sub>3</sub> OCl | -1.61     |
| 292.1223 | 292.1211   | C <sub>15</sub> H <sub>19</sub> N <sub>3</sub> OCl | 4.05      |

**Table S2** The Fukui function indices of HCQ.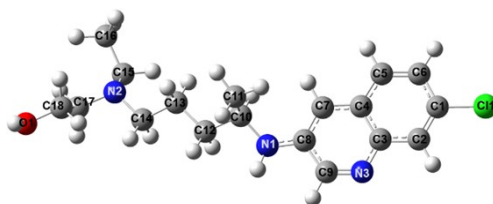

| Atoms           | Fukui Function Indices |        |        |
|-----------------|------------------------|--------|--------|
|                 | $f +$                  | $f -$  | $f 0$  |
| C <sub>1</sub>  | 0.0386                 | 0.0587 | 0.0486 |
| C <sub>2</sub>  | 0.0673                 | 0.0327 | 0.0500 |
| C <sub>3</sub>  | 0.0127                 | 0.0375 | 0.0251 |
| C <sub>4</sub>  | 0.0165                 | 0.0225 | 0.0195 |
| C <sub>5</sub>  | 0.0669                 | 0.0446 | 0.0558 |
| C <sub>6</sub>  | 0.0688                 | 0.0323 | 0.0506 |
| C <sub>7</sub>  | 0.0724                 | 0.0752 | 0.0738 |
| C <sub>8</sub>  | 0.0429                 | 0.0464 | 0.0446 |
| C <sub>9</sub>  | 0.1061                 | 0.0390 | 0.0726 |
| C <sub>10</sub> | 0.0035                 | 0.0086 | 0.0061 |
| C <sub>11</sub> | 0.0067                 | 0.0175 | 0.0121 |
| C <sub>12</sub> | 0.003                  | 0.0039 | 0.0035 |
| C <sub>13</sub> | 0.0023                 | 0.0039 | 0.0031 |
| C <sub>14</sub> | 0.0015                 | 0.0022 | 0.0019 |
| C <sub>15</sub> | 0.0001                 | 0.0004 | 0.0002 |
| C <sub>16</sub> | 0.0021                 | 0.0027 | 0.0024 |
| C <sub>17</sub> | 0.0019                 | 0.0024 | 0.0022 |
| C <sub>18</sub> | 0.0004                 | 0.0005 | 0.0005 |
| N <sub>1</sub>  | 0.0209                 | 0.1202 | 0.0705 |
| N <sub>2</sub>  | 0.0002                 | 0.0009 | 0.0006 |
| Cl <sub>1</sub> | 0.0845                 | 0.1112 | 0.0978 |
| O <sub>1</sub>  | 0.0044                 | 0.0054 | 0.0049 |

**Table S3** The Fukui function indices of C1.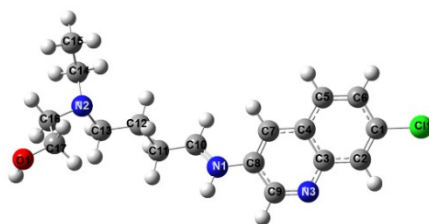

| Atoms           | Fukui Function Indices |               |         |
|-----------------|------------------------|---------------|---------|
|                 | $f +$                  | $f -$         | $f 0$   |
| C <sub>1</sub>  | 0.0321                 | 0.0106        | 0.0214  |
| C <sub>2</sub>  | 0.0169                 | 0.0065        | 0.0117  |
| C <sub>3</sub>  | 0.0271                 | 0.0066        | 0.0169  |
| C <sub>4</sub>  | 0.0103                 | 0.0028        | 0.0169  |
| C <sub>5</sub>  | 0.0193                 | 0.0031        | 0.0112  |
| C <sub>6</sub>  | 0.0280                 | 0.0089        | 0.0185  |
| C <sub>7</sub>  | 0.047                  | 0.0016        | 0.0243  |
| C <sub>8</sub>  | 0.0011                 | -0.0039       | -0.0014 |
| C <sub>9</sub>  | 0.0125                 | 0.0028        | 0.0077  |
| C <sub>10</sub> | 0.1872                 | -0.0137       | 0.0867  |
| C <sub>11</sub> | 0.0244                 | 0.0079        | 0.0161  |
| C <sub>12</sub> | 0.0166                 | 0.0077        | 0.0121  |
| C <sub>13</sub> | 0.0085                 | 0.0296        | 0.0191  |
| C <sub>14</sub> | 0.0014                 | 0.0358        | 0.0186  |
| C <sub>15</sub> | 0.0045                 | 0.0244        | 0.0144  |
| C <sub>16</sub> | 0.0045                 | 0.0343        | 0.0194  |
| C <sub>17</sub> | 0.0011                 | 0.0206        | 0.0108  |
| N <sub>1</sub>  | 0.1003                 | 0.0137        | 0.0570  |
| N <sub>2</sub>  | 0.0031                 | <b>0.2536</b> | 0.1284  |
| Cl <sub>1</sub> | 0.0646                 | 0.0271        | 0.0458  |
| O <sub>1</sub>  | 0.0108                 | 0.0423        | 0.0266  |

## REFERENCES

- [1] R. Yang, et al., *Small*, 2021, **17**, 2102408.
- [2] M.J. Frisch, Gaussian 09, 2009, Revision D.01. M. J. Frisch, G. W. Trucks, H. B. Schlegel, G. E. Scuseria, M. A. Robb, J. R. Cheeseman, G. Scalmani, V. Barone, B. Mennucci, G. A. Petersson, H. Nakatsuji, M. Caricato, X. Li, H. P. Hratchian, A. F. Izmaylov, J. Bloino, G. Zheng, J. L. Sonnenberg, M. Hada, M. Ehara, K. Toyota, R. Fukuda, J. Hasegawa, M. Ishida, T. Nakajima, Y. Honda, O. Kitao, H. Nakai, T. Vreven, J. A. Montgomery, J. E. Peralta, F. Ogliaro, M. Bearpark, J. J. Heyd, E. Brothers, K. N. Kudin, V. N. Staroverov, R. Kobayashi, J. Normand, K. Raghavachari, A. Rendell, J. C. Burant, S. S. Iyengar, J. Tomasi, M. Cossi, N. Rega, J. M. Millam, M. Klene, J. E. Knox, J. B. Cross, V. Bakken, C. Adamo, J. Jaramillo, R. Gomperts, R. E. Stratmann, O. Yazyev, A. J. Austin, R. Cammi, C. Pomelli, J. W. Ochterski, R. L. Martin, K. Morokuma, V. G. Zakrzewski, G. A. Voth, P. Salvador, J. J. Dannenberg, S. Dapprich, A. D. Daniels, Farkas, J. B. Foresman, J. V. Ortiz, J. Cioslowski and D. J. Fox, Gaussian 09, Revision D.01, Gaussian Inc.; Wallingford, CT, 2009 .
- [3] T. Lu, F. Chen, *J. Comput. Chem.*, 2012, **33**, 580-592.
